# Supplementary material for: Analysis of the air pollution climate at a background site in the Po valley
Source: Royal Society of Chemistry journal article supplement (doi:10.1039/c1em10728c), 2011-12-15

## Supporting information

### ANALYSIS OF THE AIR POLLUTION CLIMATE AT A BACKGROUND SITE IN THE PO VALLEY

Figure S1. Autocorrelation function for mean hourly concentration data

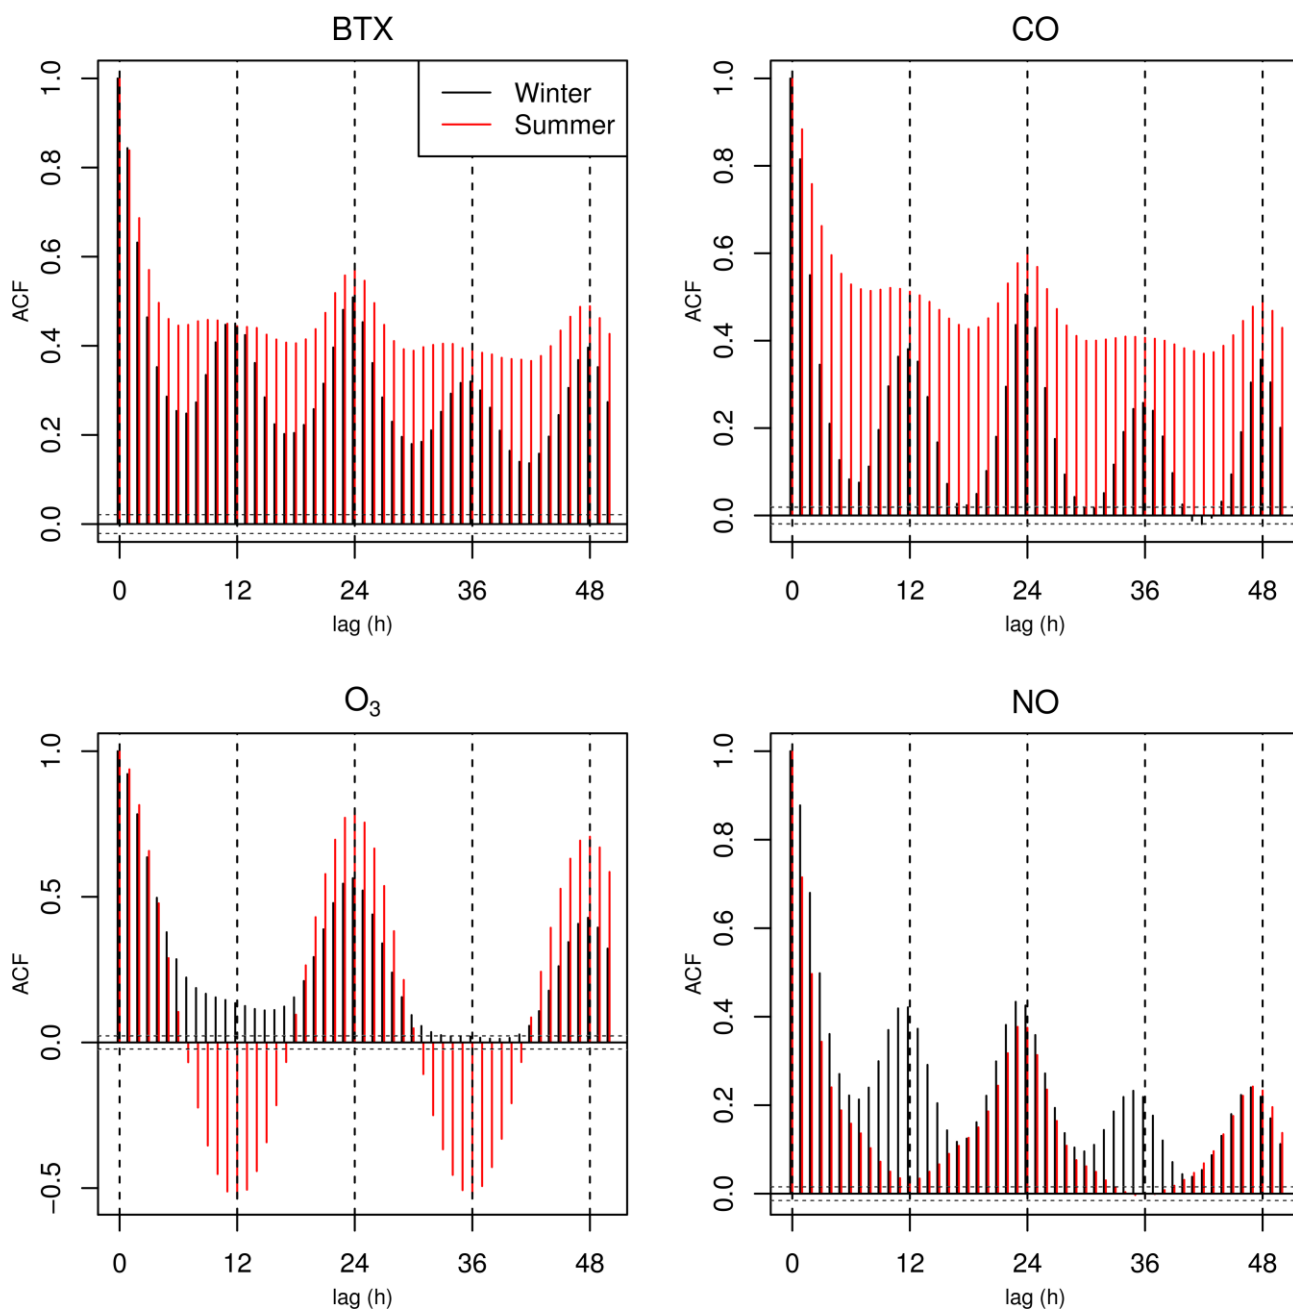

**Figure S2.** Cross correlation function for hourly concentration data and meteorological variables

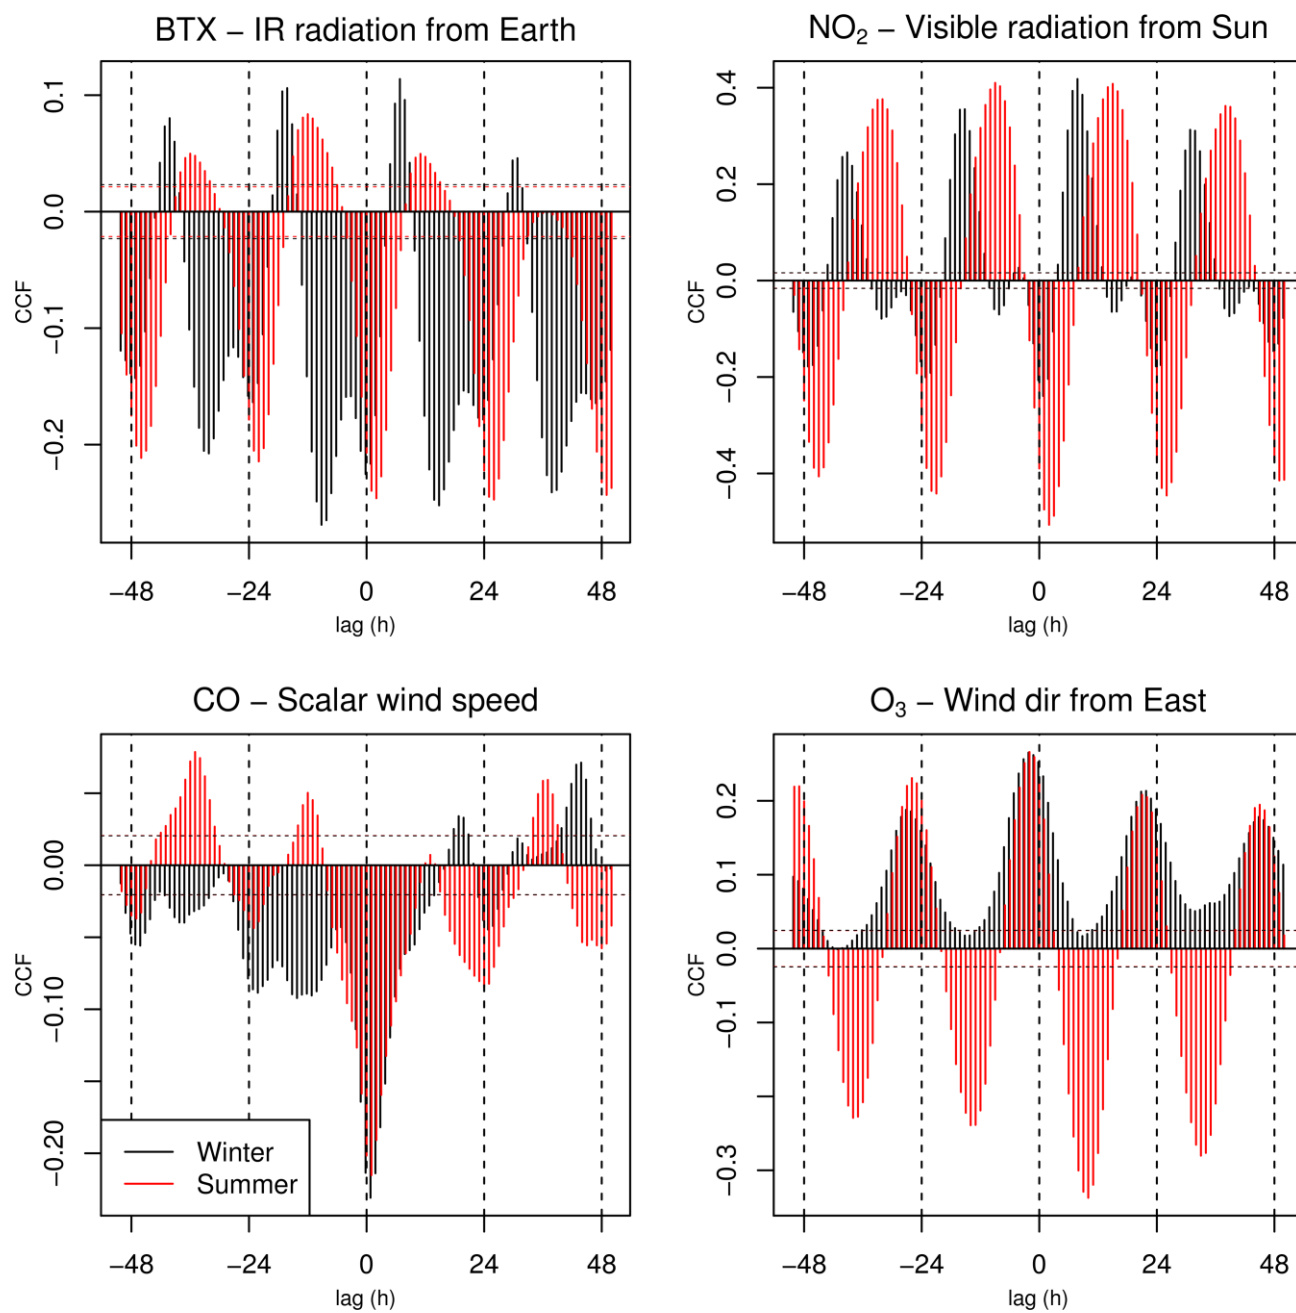

Supplement: c1em10728c.pdf [file c1em10728c.pdf]
